# Supplementary material for: c-Jun Overexpression Accelerates Wound Healing in Diabetic Rats by Human Umbilical Cord-Derived Mesenchymal Stem Cells
Source: Hindawi journal article supplement (doi:10.1155/2020/7430968), 2020-01-14
Supplement: f1 [file 7430968.f1.pdf]

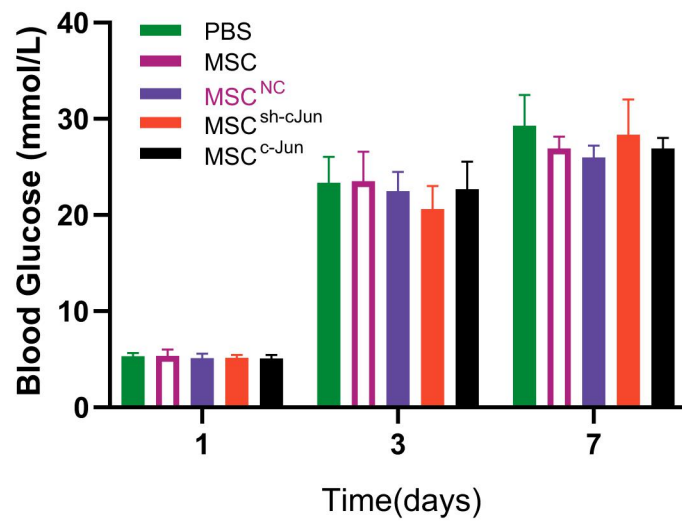

**supplementary figure**

The blood glucose levels of the animals during the experiment showing STZ-induced hyperglycemia in the diabetic rat model.
